# Supplementary material for: Genetic Diversity in Local and Exotic Avena sativa L. (Oat) Germplasm Using Multivariate Analysis
Source: MDPI journal article supplement (doi:10.3390/agronomy11091713), 2021-08-27
Supplement: s1 [file s1]

## Supplementary Material Tables

Table S1. Passport information of 236 genotypes used in the current study.

| Accessions | Genus | Species | Local Name | Coll_Donor_ No | Origin   | Accessions | Genus | Species | Local Name | Coll_Donor_ No | Origin |
|------------|-------|---------|------------|----------------|----------|------------|-------|---------|------------|----------------|--------|
| 000537     | Avena | fatua   | Jungli jai | -              | Pakistan | 000763     | Avena | sativa  | Oats       | SD CLAV 8345   | USA    |
| 000538     | Avena | fatua   | Jungli jai | -              | Pakistan | 000764     | Avena | sativa  | Oats       | SD CLAV 8346   | USA    |
| 000543     | Avena | fatua   | Jungli jai | -              | Pakistan | 000765     | Avena | sativa  | Oats       | SD CLAV 8348   | USA    |
| 000545     | Avena | fatua   | Jungli jai | -              | Pakistan | 000766     | Avena | sativa  | Oats       | SD CLAV 8351   | USA    |
| 000547     | Avena | fatua   | Jungli jai | -              | Pakistan | 000767     | Avena | sativa  | Oats       | SD CLAV 8419   | USA    |
| 000550     | Avena | fatua   | Jungli jai | -              | Pakistan | 000768     | Avena | sativa  | Oats       | SD CLAV 8420   | USA    |
| 000553     | Avena | sativa  | Oats       | V-80           | Pakistan | 000769     | Avena | sativa  | Oats       | SD CLAV 8421   | USA    |
| 000554     | Avena | sativa  | Oats       | V-199          | Pakistan | 000770     | Avena | sativa  | Oats       | SD CLAV 8435   | USA    |
| 000555     | Avena | sativa  | Oats       | V-133          | Pakistan | 000771     | Avena | sativa  | Oats       | SD CLAV 8438   | USA    |
| 000558     | Avena | sativa  | Oats       | V-145          | Pakistan | 000772     | Avena | sativa  | Oats       | SD CLAV 8442   | USA    |
| 000559     | Avena | sativa  | Oats       | -              | Pakistan | 000773     | Avena | sativa  | Oats       | SD PI 546036   | USA    |
| 000560     | Avena | sativa  | Oats       | -              | Pakistan | 000776     | Avena | sativa  | Oats       | SD CLAV 9081   | USA    |
| 000561     | Avena | sativa  | Oats       | 183            | Pakistan | 000778     | Avena | sativa  | Oats       | SD CLAV 9136   | USA    |
| 000562     | Avena | sativa  | Oats       | -              | Pakistan | 000779     | Avena | sativa  | Oats       | SD CLAV 9140   | USA    |
| 000563     | Avena | sativa  | Oats       | V-39           | Pakistan | 000780     | Avena | sativa  | Oats       | SD CLAV 9160   | USA    |
| 000564     | Avena | sativa  | Oats       | V-180          | Pakistan | 000783     | Avena | sativa  | Oats       | SD CLAV 9165   | USA    |
| 000565     | Avena | sativa  | Oats       | V-178          | Pakistan | 000784     | Avena | sativa  | Oats       | SD CLAV 9166   | USA    |
| 000566     | Avena | sativa  | Oats       | -              | Pakistan | 000785     | Avena | sativa  | Oats       | SD CLAV 9167   | USA    |
| 000568     | Avena | sativa  | Oats       | V-192          | Pakistan | 000786     | Avena | sativa  | Oats       | SD CLAV 9196   | USA    |
| 000576     | Avena | sativa  | Oats       | -              | Pakistan | 000787     | Avena | sativa  | Oats       | SD CLAV 9197   | USA    |
| 000577     | Avena | sativa  | Oats       | V-158          | Pakistan | 000788     | Avena | sativa  | Oats       | SD CLAV 9198   | USA    |
| 000581     | Avena | sativa  | Oats       | V-163          | Pakistan | 000789     | Avena | sativa  | Oats       | SD CLAV 9199   | USA    |
| 000582     | Avena | sativa  | Oats       | V-216          | Pakistan | 000790     | Avena | sativa  | Oats       | SD CLAV 9200   | USA    |
| 000583     | Avena | sativa  | Oats       | V-34           | Pakistan | 000791     | Avena | sativa  | Oats       | SD CLAV 9201   | USA    |

|        |       |        |            |            |          |        |       |        |      |              |          |
|--------|-------|--------|------------|------------|----------|--------|-------|--------|------|--------------|----------|
| 000584 | Avena | sativa | Oats       | -          | Pakistan | 000801 | Avena | sativa | Oats | SD CLAV 9243 | USA      |
| 000585 | Avena | sativa | Oats       | V-208      | Pakistan | 000802 | Avena | sativa | Oats | SD CLAV 9244 | USA      |
| 000587 | Avena | sativa | Oats       | V-60       | Pakistan | 000803 | Avena | sativa | Oats | SD CLAV 9252 | USA      |
| 000602 | Avena | sativa | Oats       | V-15       | Pakistan | 000804 | Avena | sativa | Oats | SD CLAV 9256 | USA      |
| 000610 | Avena | sativa | Oats       | V-209      | Pakistan | 000805 | Avena | sativa | Oats | SD CLAV 9257 | USA      |
| 000616 | Avena | sativa | Oats       | V-194      | Pakistan | 000806 | Avena | sativa | Oats | SD CLAV 9258 | USA      |
| 000618 | Avena | sativa | Oats       | -          | Pakistan | 000807 | Avena | sativa | Oats | SD CLAV 9261 | USA      |
| 000619 | Avena | sativa | Oats       | EAGLE NO.I | Pakistan | 000808 | Avena | sativa | Oats | SD CLAV 9263 | USA      |
| 000622 | Avena | sativa | Oats       | PLASTUR    | Pakistan | 000809 | Avena | sativa | Oats | SD CLAV 9266 | USA      |
| 000624 | Avena | sativa | Oats       | FUEGRAM    | Pakistan | 000810 | Avena | sativa | Oats | SD CLAV 9297 | USA      |
| 000645 | Avena | sativa | Jangli jai | -          | Pakistan | 000811 | Avena | sativa | Oats | SD CLAV 9316 | USA      |
| 000646 | Avena | sativa | Oats       | -          | Pakistan | 000812 | Avena | sativa | Oats | SD CLAV 9391 | USA      |
| 000647 | Avena | sativa | Oats       | -          | Pakistan | 000817 | Avena | sativa | Oats | SD CLAV 9397 | USA      |
| 000649 | Avena | sativa | Oats       | -          | Pakistan | 000818 | Avena | sativa | Oats | SD CLAV 9398 | USA      |
| 000651 | Avena | sativa | Jangli jai | -          | Pakistan | 000827 | Avena | sativa | Oats | SD CLAV 9423 | USA      |
| 000657 | Avena | sativa | Jangli jai | -          | Pakistan | 000830 | Avena | sativa | Oats | SD PI 464651 | USA      |
| 000659 | Avena | sativa | Jungli jai | -          | Pakistan | 000831 | Avena | sativa | Oats | SD PI 467882 | USA      |
| 000661 | Avena | sativa | Jungli jai | -          | Pakistan | 000832 | Avena | sativa | Oats | SD PI 468108 | USA      |
| 000662 | Avena | sativa | Javi       | -          | Pakistan | 000839 | Avena | sativa | Oats | SD PI 479658 | USA      |
| 000663 | Avena | sativa | Javi       | -          | Pakistan | 000841 | Avena | sativa | Oats | SD PI 479676 | USA      |
| 000665 | Avena | sativa | Javi       | -          | Pakistan | 000842 | Avena | sativa | Oats | SD PI 483040 | USA      |
| 000666 | Avena | sativa | Javi       | -          | Pakistan | 000843 | Avena | sativa | Oats | SD PI 483041 | USA      |
| 000668 | Avena | sativa | Javi       | -          | Pakistan | 000846 | Avena | sativa | Oats | SD PI 483044 | USA      |
| 000669 | Avena | sativa | Javi       | -          | Pakistan | 000851 | Avena | sativa | Oats | SD PI 486324 | USA      |
| 000670 | Avena | sativa | Javi       | -          | Pakistan | 000852 | Avena | sativa | Oats | SD PI 486325 | USA      |
| 000671 | Avena | sativa | Javi       | -          | Pakistan | 000918 | Avena | sativa | Oats | -            | Pakistan |
| 000672 | Avena | sativa | Javi       | -          | Pakistan | 022322 | Avena | sativa | Oats | FLORIDA      | Pakistan |
| 000674 | Avena | sativa | Javi       | -          | Pakistan | 022323 | Avena | sativa | Oats | CIMMARAN     | Pakistan |
| 000675 | Avena | sativa | Javi       | -          | Pakistan | 022324 | Avena | sativa | Oats | TAMO         | Pakistan |
| 000676 | Avena | sativa | Javi       | -          | Pakistan | 022325 | Avena | sativa | Oats | D-N-8        | Pakistan |
| 000677 | Avena | sativa | Javi       | -          | Pakistan | 022326 | Avena | sativa | Oats | ESK          | Pakistan |
| 000678 | Avena | sativa | Javi       | -          | Pakistan | 022328 | Avena | sativa | Oats | WALAROO      | Pakistan |

|        |       |        |            |              |          |        |       |        |      |                |          |
|--------|-------|--------|------------|--------------|----------|--------|-------|--------|------|----------------|----------|
| 000679 | Avena | sativa | Javi       | -            | Pakistan | 022329 | Avena | sativa | Oats | MARIDO         | Pakistan |
| 000680 | Avena | sativa | Javi       | -            | Pakistan | 022330 | Avena | sativa | Oats | TIBOR          | Pakistan |
| 000681 | Avena | sativa | Javi       | -            | Pakistan | 022335 | Avena | sativa | Oats | AUSTRALIAN     | Pakistan |
| 000682 | Avena | sativa | Javi       | -            | Pakistan | 022338 | Avena | sativa | Oats | NO.651         | Pakistan |
| 000683 | Avena | sativa | Javi       | -            | Pakistan | 022339 | Avena | sativa | Oats | NO.75524       | Pakistan |
| 000684 | Avena | sativa | Javi       | -            | Pakistan | 022340 | Avena | sativa | Oats | NORA           | Pakistan |
| 000685 | Avena | sativa | Javi       | -            | Pakistan | 022341 | Avena | sativa | Oats | DOLPHIN        | Pakistan |
| 000686 | Avena | sativa | Javi       | -            | Pakistan | 022342 | Avena | sativa | Oats | RHAIMAN        | Pakistan |
| 000687 | Avena | sativa | Javi       | -            | Pakistan | 022347 | Avena | sativa | Oats | NO.708         | Pakistan |
| 000688 | Avena | sativa | Javi       | -            | Pakistan | 022348 | Avena | sativa | Oats | HAY            | Pakistan |
| 000689 | Avena | sativa | Javi       | -            | Pakistan | 022349 | Avena | sativa | Oats | BOB            | Pakistan |
| 000690 | Avena | sativa | Javi       | -            | Pakistan | 022350 | Avena | sativa | Oats | NO.2088        | Pakistan |
| 000691 | Avena | sativa | Javi       | -            | Pakistan | 022351 | Avena | sativa | Oats | JAVA-LAHORI    | Pakistan |
| 000692 | Avena | sativa | Javi       | -            | Pakistan | 022352 | Avena | sativa | Oats | NO.616         | Pakistan |
| 000693 | Avena | sativa | Jangli jai | -            | Pakistan | 022353 | Avena | sativa | Oats | ECHIDNA        | Pakistan |
| 000694 | Avena | sativa | Jangli jai | -            | Pakistan | 022354 | Avena | sativa | Oats | MORTLOCK       | Pakistan |
| 000695 | Avena | sativa | Jangli jai | -            | Pakistan | 022355 | Avena | sativa | Oats | KALIGAR x AVON | Pakistan |
| 000696 | Avena | sativa | Jangli jai | -            | Pakistan | 022356 | Avena | sativa | Oats | FULGRAIN       | Pakistan |
| 000697 | Avena | sativa | Javi       | -            | Pakistan | 022357 | Avena | sativa | Oats | DONALD         | Pakistan |
| 000719 | Avena | sativa | Oats       | SD PI 546037 | USA      | 022358 | Avena | sativa | Oats | KENT           | Pakistan |
| 000720 | Avena | sativa | Oats       | SD CLAV 8062 | USA      | 022359 | Avena | sativa | Oats | DOMONT         | Pakistan |
| 000721 | Avena | sativa | Oats       | SD CLAV 8097 | USA      | 022360 | Avena | sativa | Oats | WINJARDE       | Pakistan |
| 000722 | Avena | sativa | Oats       | SD CLAV 8098 | USA      | 022361 | Avena | sativa | Oats | NO.641         | Pakistan |
| 000723 | Avena | sativa | Oats       | SD CLAV 8100 | USA      | 022362 | Avena | sativa | Oats | S-85           | Pakistan |
| 000724 | Avena | sativa | Oats       | SD CLAV 8101 | USA      | 022363 | Avena | sativa | Oats | NO.677         | Pakistan |
| 000725 | Avena | sativa | Oats       | SD CLAV 8163 | USA      | 022364 | Avena | sativa | Oats | MURRAY         | Pakistan |
| 000726 | Avena | sativa | Oats       | SD CLAV 8170 | USA      | 022365 | Avena | sativa | Oats | S-141          | Pakistan |
| 000727 | Avena | sativa | Oats       | SD CLAV 8171 | USA      | 022368 | Avena | sativa | Oats | STOUT          | Pakistan |
| 000728 | Avena | sativa | Oats       | SD CLAV 8172 | USA      | 022369 | Avena | sativa | Oats | BROOKS         | Pakistan |
| 000729 | Avena | sativa | Oats       | SD CLAV 8174 | USA      | 022370 | Avena | sativa | Oats | NO.647         | Pakistan |
| 000730 | Avena | sativa | Oats       | SD CLAV 8178 | USA      | 022371 | Avena | sativa | Oats | NO.663         | Pakistan |
| 000731 | Avena | sativa | Oats       | SD CLAV 8179 | USA      | 022372 | Avena | sativa | Oats | SAIA           | Pakistan |

|        |       |        |      |              |     |        |       |        |      |             |          |
|--------|-------|--------|------|--------------|-----|--------|-------|--------|------|-------------|----------|
| 000732 | Avena | sativa | Oats | SD CLAV 8180 | USA | 022373 | Avena | sativa | Oats | COOLABAH    | Pakistan |
| 000733 | Avena | sativa | Oats | SD CLAV 8181 | USA | 022374 | Avena | sativa | Oats | PD2-LV65    | Pakistan |
| 000734 | Avena | sativa | Oats | SD CLAV 8182 | USA | 022375 | Avena | sativa | Oats | NO.626      | Pakistan |
| 000735 | Avena | sativa | Oats | SD CLAV 8183 | USA | 022377 | Avena | sativa | Oats | OGLE        | Pakistan |
| 000736 | Avena | sativa | Oats | SD CLAV 8205 | USA | 022378 | Avena | sativa | Oats | X-5229-1    | Pakistan |
| 000737 | Avena | sativa | Oats | SD CLAV 8226 | USA | 022379 | Avena | sativa | Oats | HAKAE       | Pakistan |
| 000738 | Avena | sativa | Oats | SD CLAV 8232 | USA | 022383 | Avena | sativa | Oats | GOLDEN REIN | Pakistan |
| 000739 | Avena | sativa | Oats | SD CLAV 8248 | USA | 022384 | Avena | sativa | Oats | NO.85-125   | Pakistan |
| 000740 | Avena | sativa | Oats | SD CLAV 8250 | USA | 022385 | Avena | sativa | Oats | DAYLOP      | Pakistan |
| 000741 | Avena | sativa | Oats | SD CLAV 8251 | USA | 022386 | Avena | sativa | Oats | AVON(AUST)  | Pakistan |
| 000742 | Avena | sativa | Oats | SD CLAV 8260 | USA | 022387 | Avena | sativa | Oats | NO.75526    | Pakistan |
| 000743 | Avena | sativa | Oats | SD CLAV 8263 | USA | 022388 | Avena | sativa | Oats | FATUA       | Pakistan |
| 000744 | Avena | sativa | Oats | SD CLAV 8265 | USA | 022389 | Avena | sativa | Oats | OZARK       | Pakistan |
| 000745 | Avena | sativa | Oats | SD CLAV 8266 | USA | 022390 | Avena | sativa | Oats | VICAR       | Pakistan |
| 000746 | Avena | sativa | Oats | SD CLAV 8267 | USA | 022391 | Avena | sativa | Oats | DANE        | Pakistan |
| 000747 | Avena | sativa | Oats | SD CLAV 8268 | USA | 022392 | Avena | sativa | Oats | BULBAN      | Pakistan |
| 000748 | Avena | sativa | Oats | SD CLAV 8269 | USA | 022393 | Avena | sativa | Oats | X-5445-4    | Pakistan |
| 000749 | Avena | sativa | Oats | SD CLAV 8270 | USA | 022394 | Avena | sativa | Oats | SCOTT       | Pakistan |
| 000750 | Avena | sativa | Oats | SD CLAV 8271 | USA | 022395 | Avena | sativa | Oats | AVON        | Pakistan |
| 000751 | Avena | sativa | Oats | SD CLAV 8274 | USA | 022396 | Avena | sativa | Oats | S-81        | Pakistan |
| 000752 | Avena | sativa | Oats | SD CLAV 8275 | USA | 022397 | Avena | sativa | Oats | CUSCADE     | Pakistan |
| 000753 | Avena | sativa | Oats | SD CLAV 8276 | USA | 022398 | Avena | sativa | Oats | SWAN        | Pakistan |
| 000754 | Avena | sativa | Oats | SD CLAV 8277 | USA | 022399 | Avena | sativa | Oats | SUPER LATE  | Pakistan |
| 000755 | Avena | sativa | Oats | SD CLAV 8280 | USA | 022400 | Avena | sativa | Oats | Pakistan    | Pakistan |
| 000757 | Avena | sativa | Oats | SD CLAV 8303 | USA | 022401 | Avena | sativa | Oats | NO.725      | Pakistan |
| 000758 | Avena | sativa | Oats | SD CLAV 8304 | USA | 022402 | Avena | sativa | Oats | NO.707      | Pakistan |
| 000759 | Avena | sativa | Oats | SD CLAV 8306 | USA | 022405 | Avena | sativa | Oats | NO.7552     | Pakistan |
| 000760 | Avena | sativa | Oats | SD CLAV 8311 | USA | 022406 | Avena | sativa | Oats | CENTENNIAL  | Pakistan |
| 000761 | Avena | sativa | Oats | SD CLAV 8318 | USA | 022413 | Avena | sativa | Oats | REIL        | Pakistan |
| 000762 | Avena | sativa | Oats | SD CLAV 8319 | USA | CHECK  | Avena | sativa | Oats |             | Pakistan |

Table S2. Frequency distribution and total genetic diversity in Oat (*Avena sativa*) genotypes.

| <b>Bands</b> | Frequency Distribution | Total Genetic Diversity |
|--------------|------------------------|-------------------------|
| B-1          | 232                    | 0.72                    |
| B--2         | 192                    | 7.90                    |
| B-3          | 176                    | 10.77                   |
| B-4          | 158                    | 14.00                   |
| B-5          | 176                    | 10.77                   |
| B-6          | 159                    | 13.82                   |
| B-7          | 128                    | 19.39                   |
| B-8          | 158                    | 14.01                   |
| B-9          | 139                    | 17.42                   |
| B-10         | 136                    | 17.95                   |
| B-11         | 137                    | 17.77                   |
| B-12         | 150                    | 15.44                   |
| B-13         | 161                    | 13.46                   |
